# Supplementary material for: Obesity-driven mitochondrial dysfunction in human adipose tissue-derived mesenchymal stem/stromal cells involves epigenetic changes
Source: PubMed Central journal article supplement (PMC11144257; doi:10.1038/s41419-024-06774-8), 2024-06-01
Supplement: 41419_2024_6774_MOESM1_ESM.pdf [file 41419_2024_6774_MOESM1_ESM.pdf]

## SUPPLEMENTAL MATERIAL

### Supplemental Figure Legends:

*Figure S1. Expression of proteins encoded by hypo-hydroxymethylated/downregulated and hyper-hydroxymethylated/upregulated genes in Obese-MSCs.* Protein expression of DCI (encoded by *ECI1*) followed the same direction of its parent gene, expression of MECR was higher in obese- versus non-obese-MSCs, but expression of coenzyme A (CoA), encoded by *COASY*, was similar between the groups. Similarly, expression of adenine nucleotide transporter (ANT)-1 (encoded by *SLC25A4*) and *SLC22A4* did not differ between the groups. However, in contrast to their gene expression, protein expression of *COQ10B* and *LAMC1* was lower in obese- versus non-obese-MSCs.

*Figure S2. Obesity does not modulate the expression of genes linked to lipid metabolism in human MSCs.* Expression (qPCR) of the lipogenic factors Diacylglycerol O-Acyltransferase 1 (*DGAT1*), Fas Cell Surface Death Receptor (*FAS*), and Lipoprotein Lipase (*LPL*) and the lipolytic factors Patatin Like Phospholipase Domain Containing 2 (*ATGL*), Lipase E, Hormone Sensitive Type (*HSL*), and Monoglyceride Lipase (*MGL*).

*Figure S3. ANT-1 original uncropped western blot*

*Figure S4. SLC22A4 original uncropped western blot*

*Figure S5. COQ10B original uncropped western blot*

*Figure S6.* LAMC1 original uncropped western blot

*Figure S7.* CoA original uncropped western blot

*Figure S8.* DCI original uncropped western blot

*Figure S9.* MECR original uncropped western blot

*Figure S10.* GAPDH original uncropped western blot

*Figure S11.* Expression of *SLC25A4*, *SLC22A4*, *COQ10B*, *LAMC1*, *COASY*, *ECI1*, and *MECR* in Non-obese- and Obese-MSCs untreated or treated with Bobcat339 or dimethyl alpha-ketoglutarate (DMAKG). \*p-value < 0.05 vs. Non-obese-MSCs (untreated).

Fig. S1

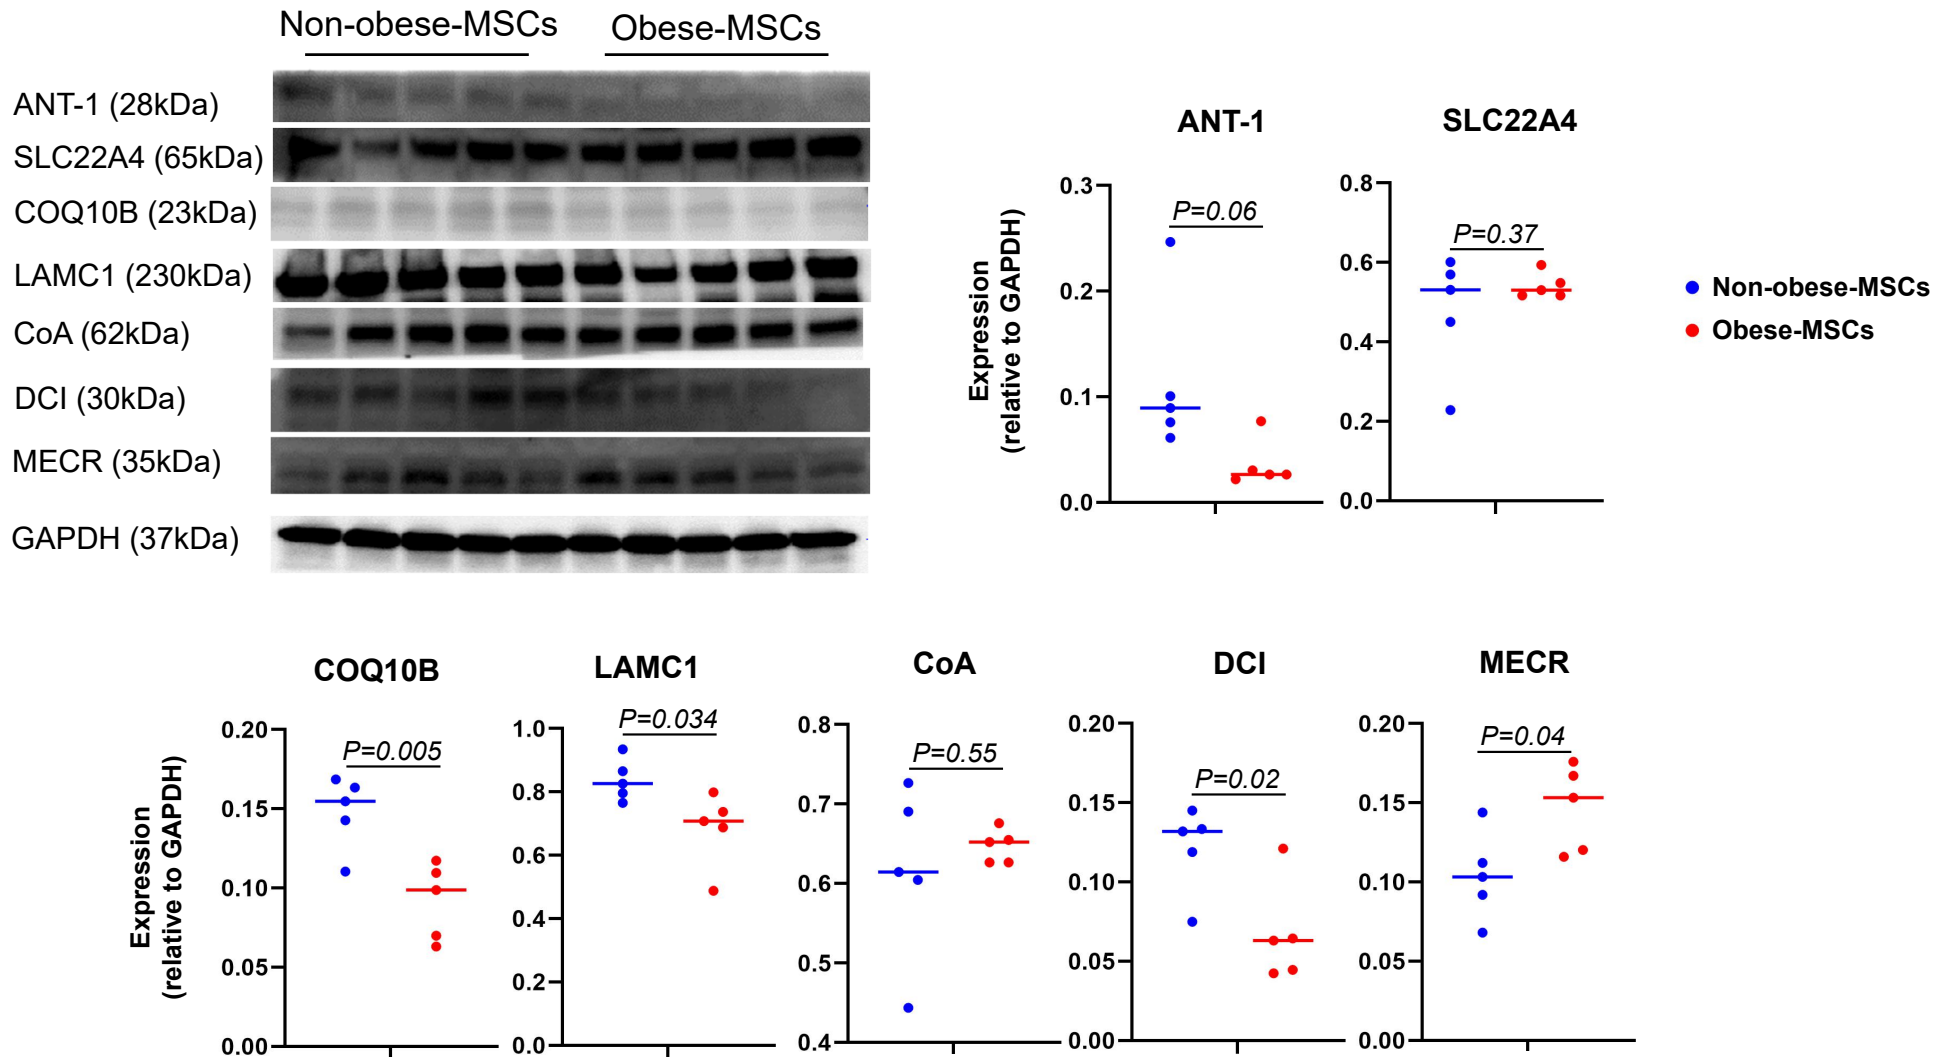

Fig. S2

A

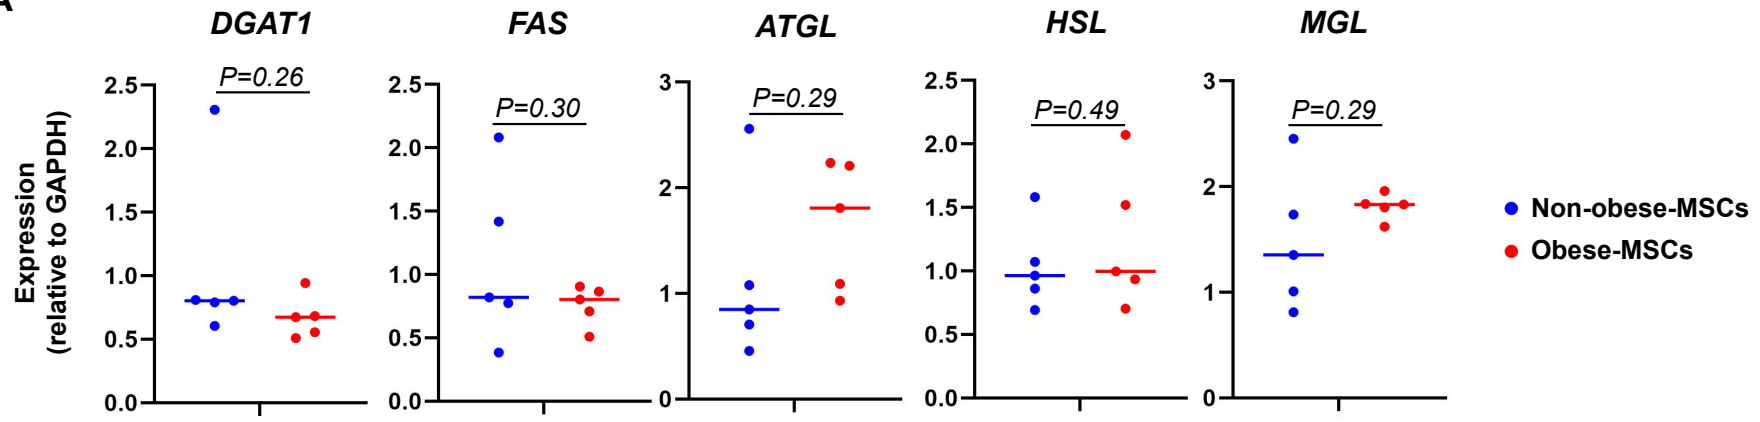

Fig. S3

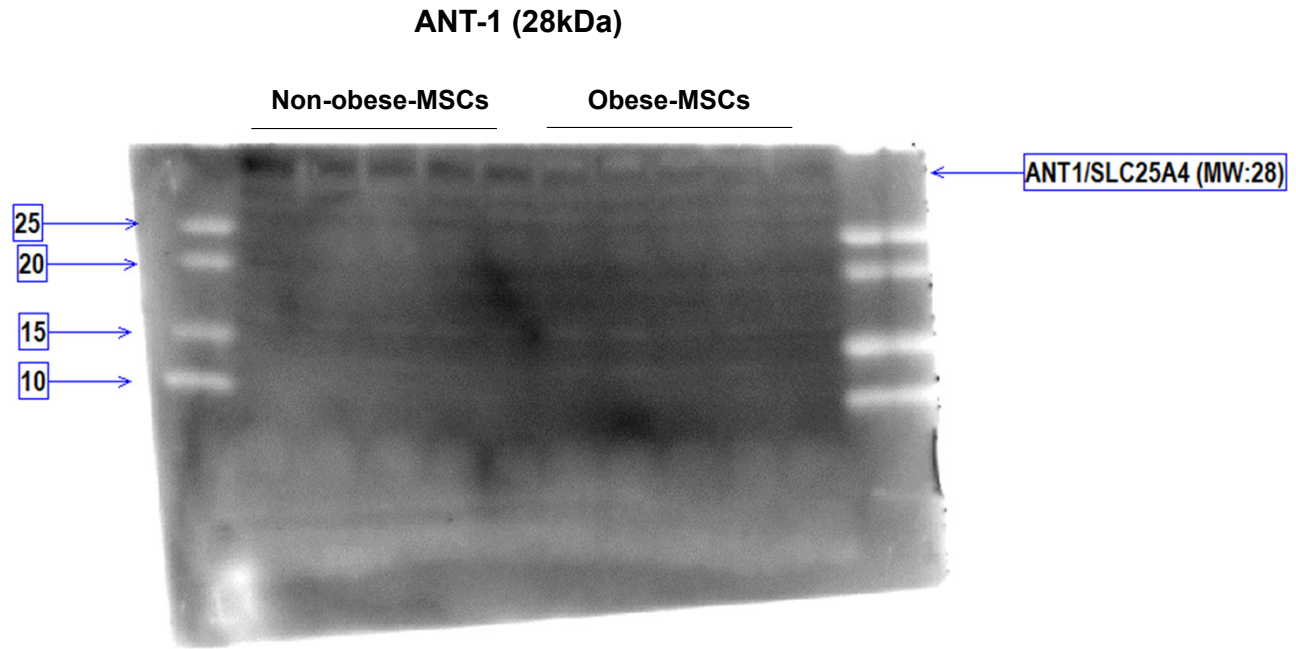

Fig. S4

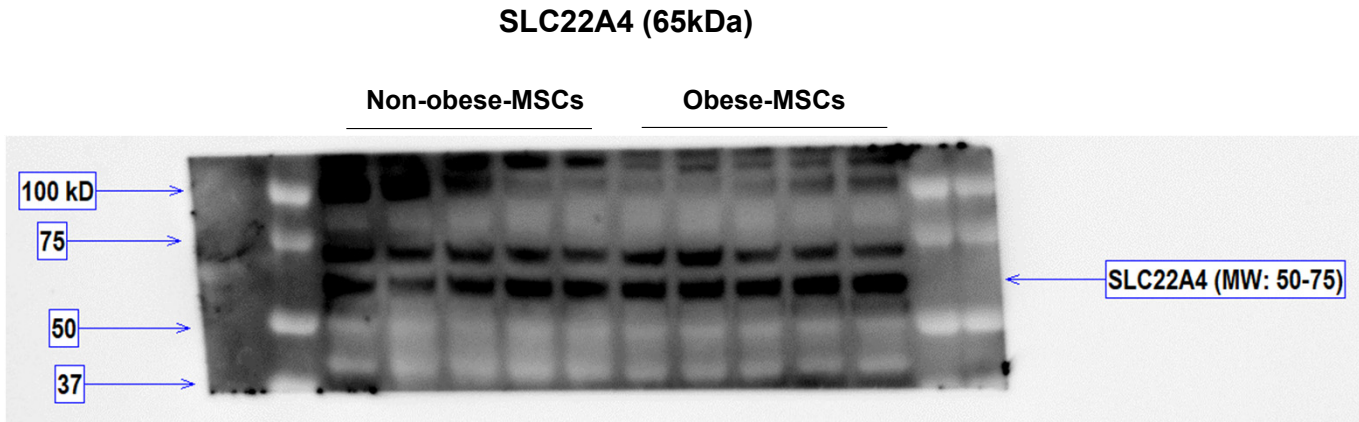

Fig. S5

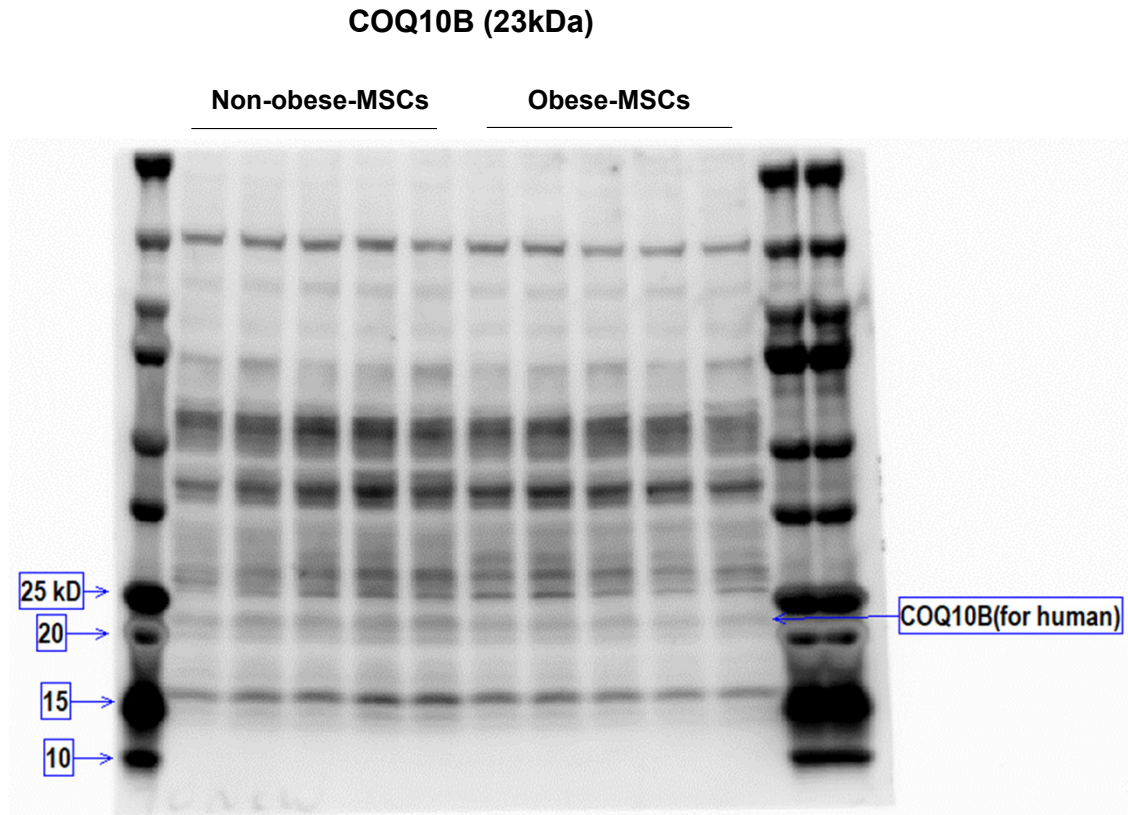

Fig. S6

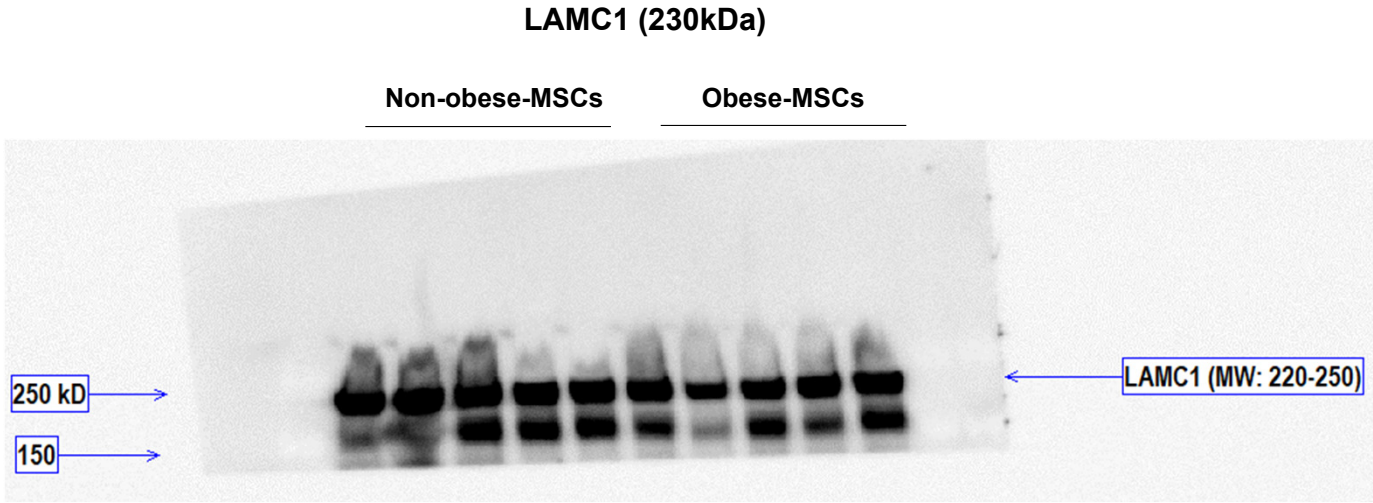



Fig. S7

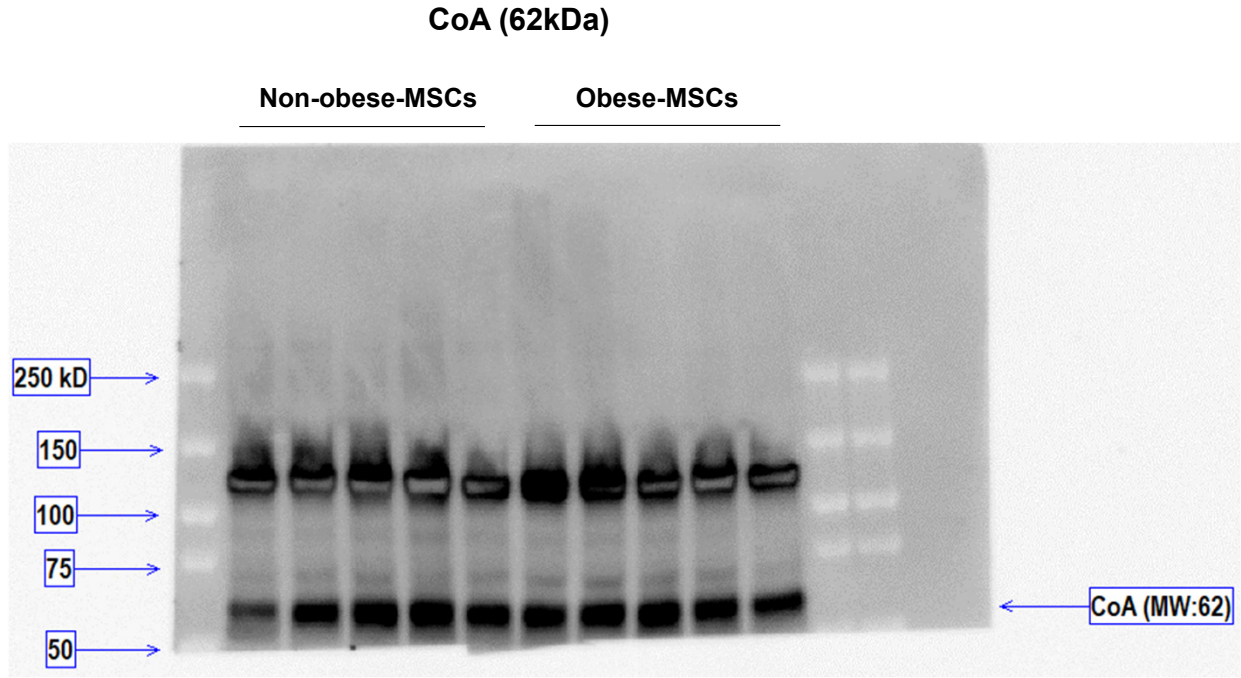

Fig. S8

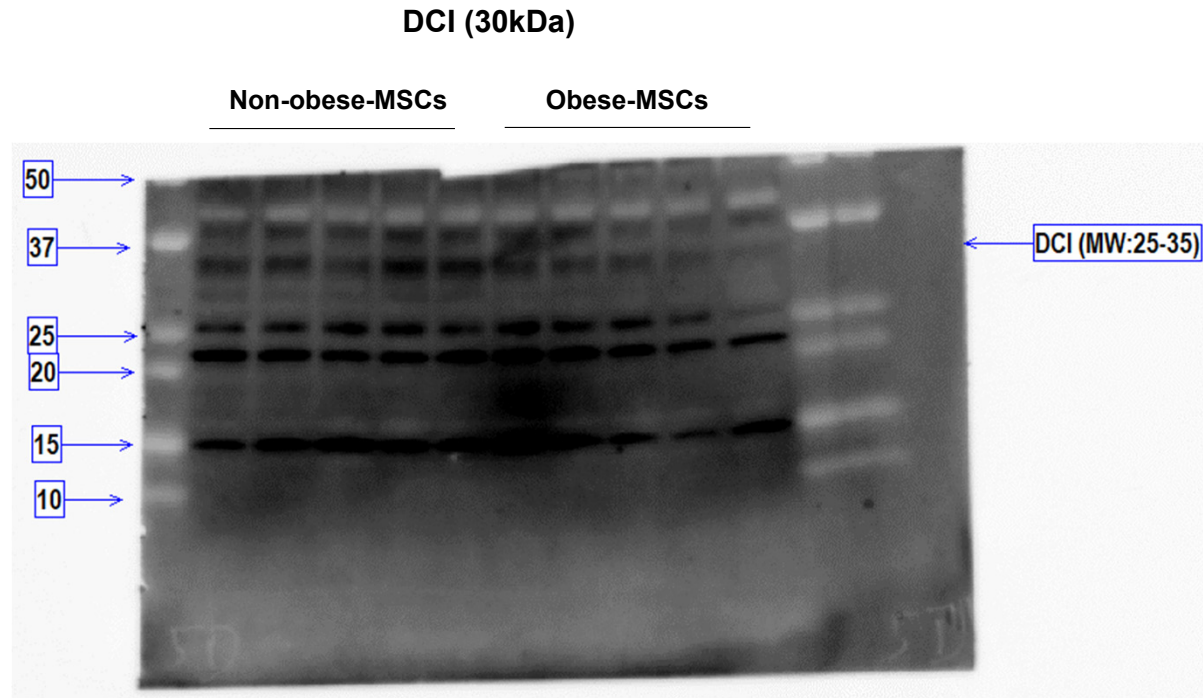

Fig. S9

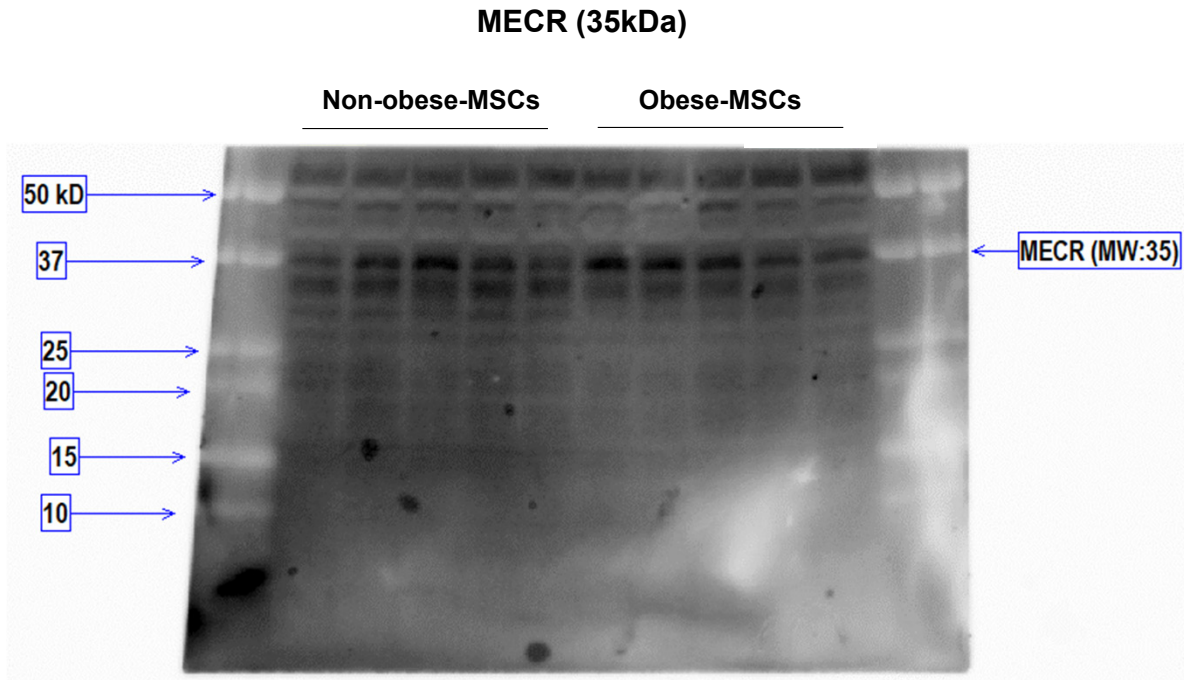

Fig. S10

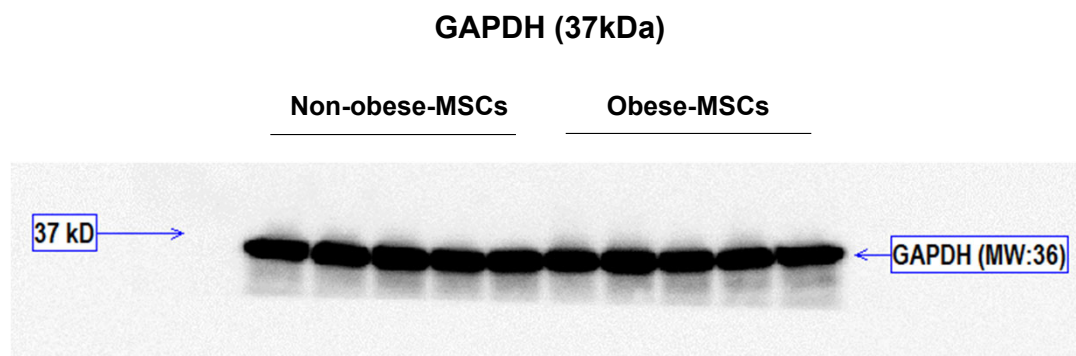

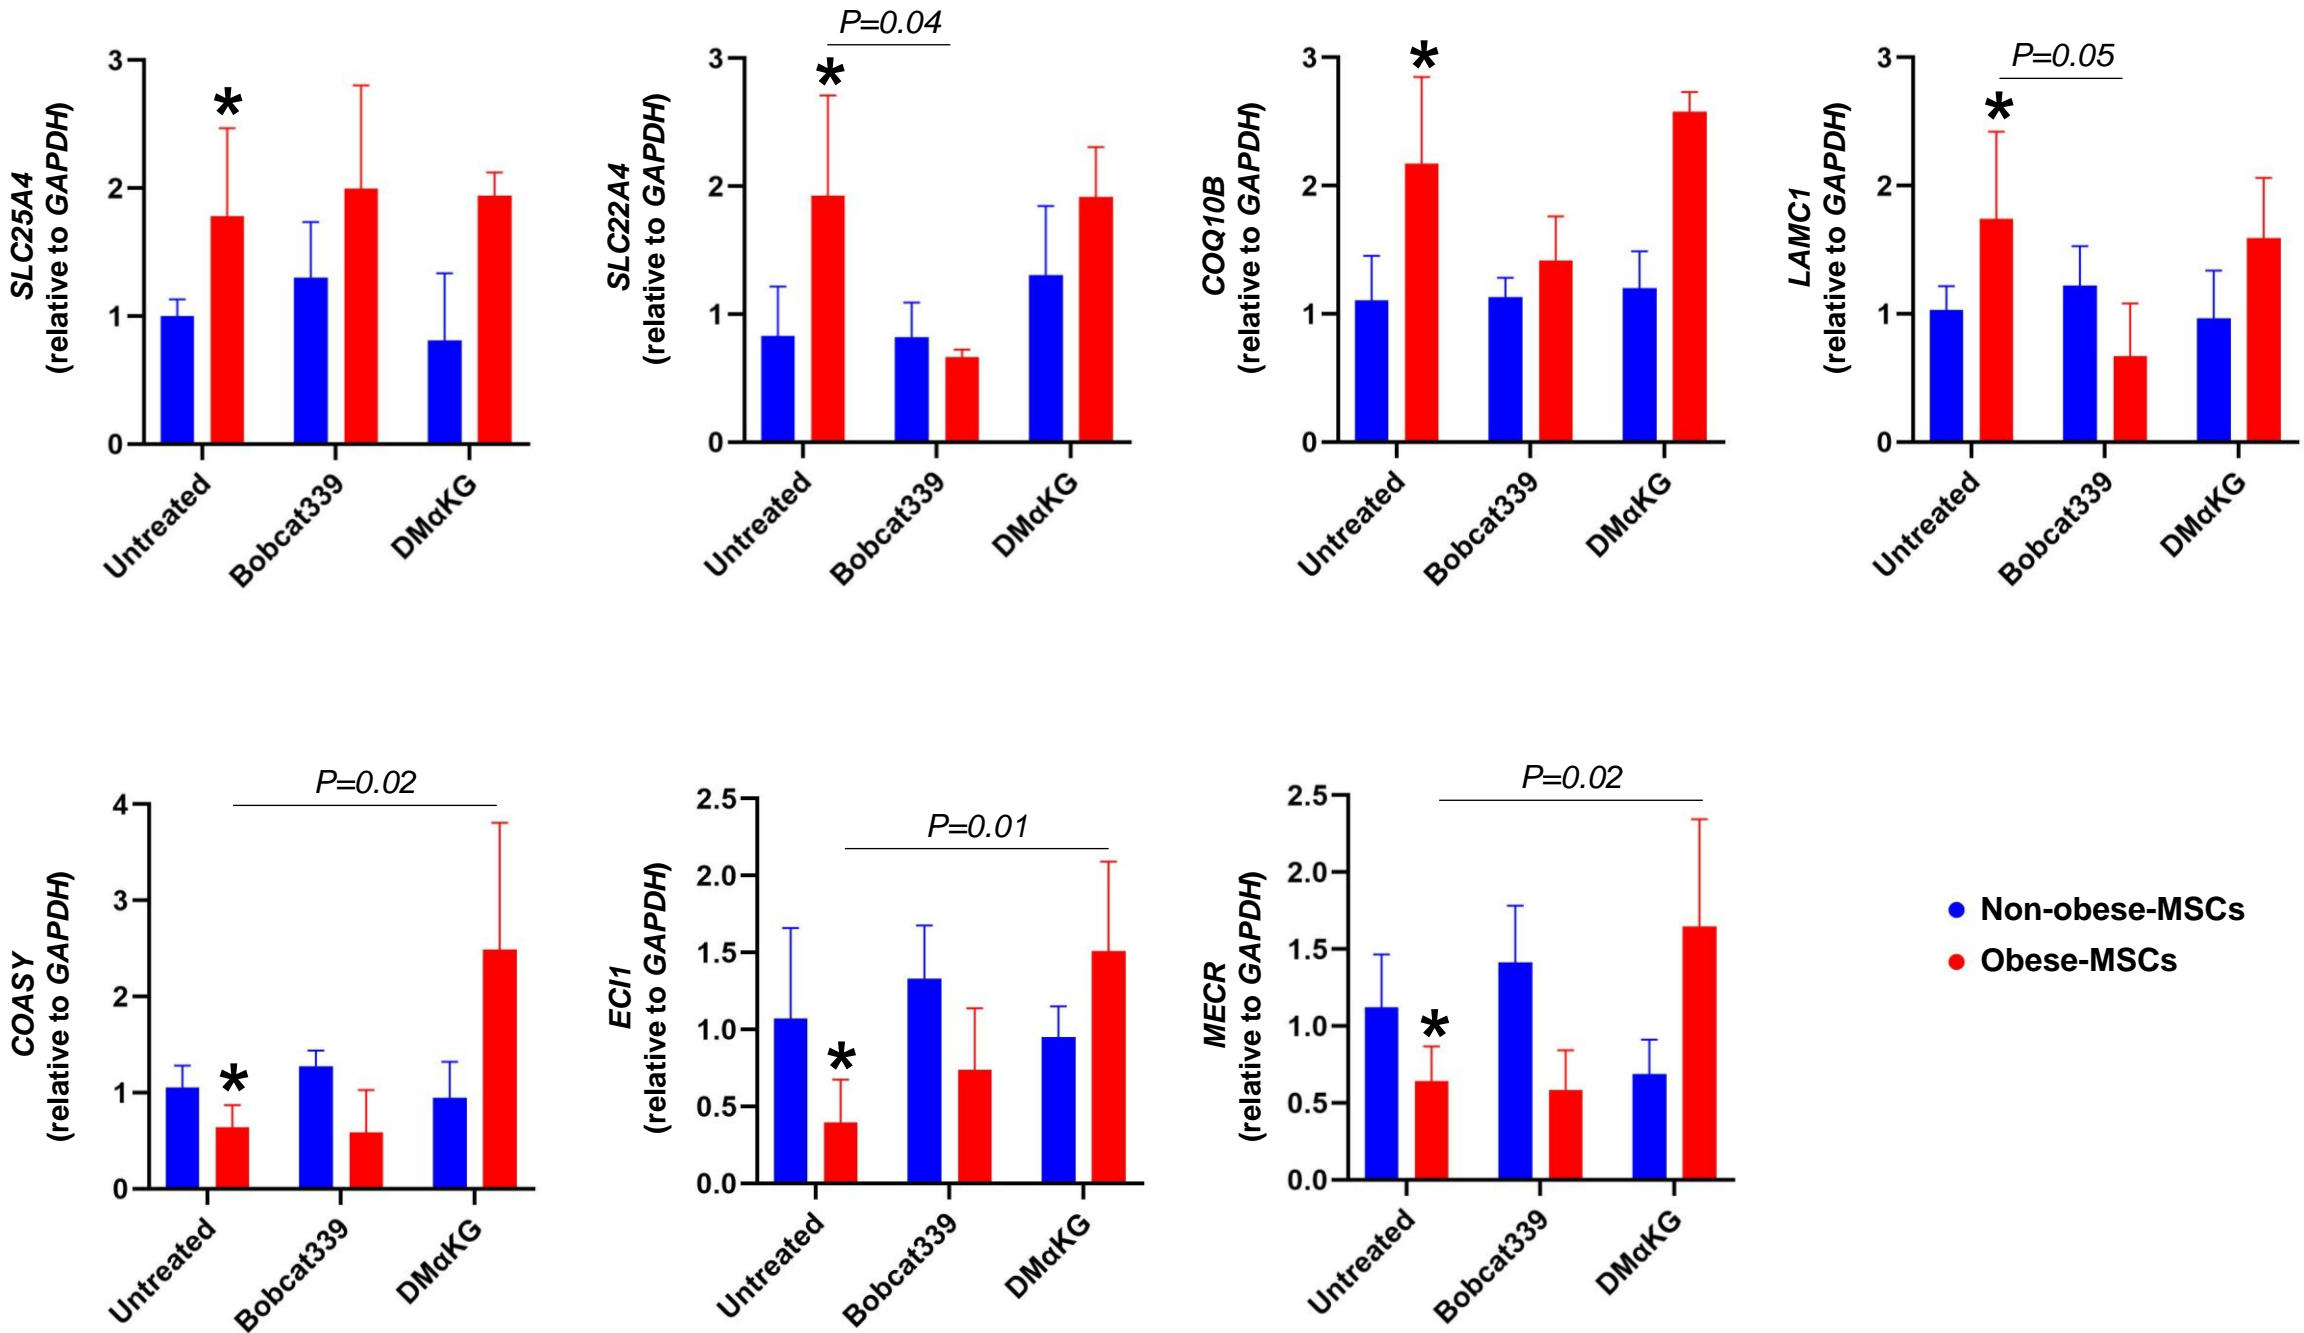

**Table S1.** Genes with significant higher 5hmC levels in obese- versus non-obese-MSCs. P values were adjusted by triglycerides levels, antihypertensives, and multivitamins.

| Peak # | Gene Symbol | Chr   | Start    | End      | Triglycerides<br>(adj p value) | Antihypertensives<br>(adj p value) | Multivitamins<br>(adj p value) |
|--------|-------------|-------|----------|----------|--------------------------------|------------------------------------|--------------------------------|
| 1      | FOXRED1     | chr11 | 1.26E+08 | 1.26E+08 | 0.04995                        | 0.00105                            | 0.00117                        |
| 2      | TARS2       | chr1  | 1.5E+08  | 1.5E+08  | 0.04974                        | 0.00102                            | 0.00113                        |
| 3      | ATXN2       | chr12 | 1.11E+08 | 1.11E+08 | 0.04676                        | 0.00092                            | 0.00096                        |
| 4      | ELAC2       | chr17 | 13003450 | 13004108 | 0.04650                        | 0.00088                            | 0.00095                        |
| 5      | CYP24A1     | chr20 | 54173322 | 54173973 | 0.04646                        | 0.00088                            | 0.00092                        |
| 6      | CRY1        | chr12 | 1.07E+08 | 1.07E+08 | 0.04607                        | 0.00083                            | 0.00086                        |
| 7      | GPX4        | chr19 | 1105658  | 1106266  | 0.04574                        | 0.00078                            | 0.00084                        |
| 8      | ANGEL2      | chr1  | 2.13E+08 | 2.13E+08 | 0.04563                        | 0.00078                            | 0.00084                        |
| 9      | AMT         | chr3  | 49417818 | 49417973 | 0.04558                        | 0.00076                            | 0.00083                        |
| 10     | POLRMT      | chr19 | 618997   | 619110   | 0.04072                        | 0.00076                            | 0.00082                        |
| 11     | MCU         | chr10 | 72692619 | 72693066 | 0.03867                        | 0.00074                            | 0.00082                        |
| 12     | SARS2       | chr19 | 38919762 | 38919999 | 0.03845                        | 0.00074                            | 0.00082                        |
| 13     | ACSM3       | chr16 | 20610243 | 20610310 | 0.03823                        | 0.00074                            | 0.00080                        |
| 14     | RAB11FIP5   | chr2  | 73156638 | 73156721 | 0.03818                        | 0.00073                            | 0.00079                        |
| 15     | PABPC5      | chrX  | 91434595 | 91434894 | 0.03799                        | 0.00072                            | 0.00078                        |
| 16     | MRPS5       | chr2  | 95106423 | 95106688 | 0.03726                        | 0.00072                            | 0.00078                        |
| 17     | ADCK5       | chr8  | 1.44E+08 | 1.44E+08 | 0.03707                        | 0.00069                            | 0.00077                        |
| 18     | UQCRC1      | chr3  | 48609497 | 48610037 | 0.03707                        | 0.00065                            | 0.00075                        |
| 19     | AIFM3       | chr22 | 20974063 | 20974172 | 0.03427                        | 0.00064                            | 0.00073                        |
| 20     | MRPS36      | chr5  | 69217760 | 69218115 | 0.03415                        | 0.00064                            | 0.00072                        |
| 21     | SLC25A11    | chr17 | 4940381  | 4940993  | 0.03170                        | 0.00063                            | 0.00072                        |
| 22     | CPT1B       | chr22 | 50572875 | 50573100 | 0.03154                        | 0.00063                            | 0.00071                        |
| 23     | COX6B2      | chr19 | 55351699 | 55352326 | 0.02876                        | 0.00062                            | 0.00070                        |
| 24     | COQ10B      | chr2  | 1.97E+08 | 1.97E+08 | 0.02854                        | 0.00059                            | 0.00070                        |
| 25     | SPATA20     | chr17 | 50554251 | 50554450 | 0.02847                        | 0.00058                            | 0.00070                        |
| 26     | ACADSB      | chr10 | 1.23E+08 | 1.23E+08 | 0.02810                        | 0.00058                            | 0.00068                        |
| 27     | AC114730.3  | chr2  | 2.42E+08 | 2.42E+08 | 0.02805                        | 0.00058                            | 0.00068                        |
| 28     | BNIP3L      | chr8  | 26422593 | 26422849 | 0.02683                        | 0.00057                            | 0.00066                        |
| 29     | CA5B        | chrX  | 15738270 | 15738352 | 0.02677                        | 0.00057                            | 0.00066                        |
| 30     | ECHDC3      | chr10 | 11755345 | 11755730 | 0.02645                        | 0.00056                            | 0.00066                        |
| 31     | SLC25A4     | chr4  | 1.85E+08 | 1.85E+08 | 0.02605                        | 0.00056                            | 0.00062                        |
| 32     | RPS14       | chr5  | 1.5E+08  | 1.5E+08  | 0.02576                        | 0.00056                            | 0.00061                        |
| 33     | VAR52       | chr6  | 30923353 | 30924560 | 0.02571                        | 0.00055                            | 0.00060                        |
| 34     | TFAM        | chr10 | 58385022 | 58385648 | 0.02512                        | 0.00055                            | 0.00060                        |
| 35     | CARS2       | chr13 | 1.11E+08 | 1.11E+08 | 0.02402                        | 0.00055                            | 0.00060                        |
| 36     | OBSCN       | chr1  | 2.28E+08 | 2.28E+08 | 0.02233                        | 0.00054                            | 0.00060                        |
| 37     | FASN        | chr17 | 82085035 | 82085156 | 0.02177                        | 0.00053                            | 0.00059                        |
| 38     | LONP1       | chr19 | 5690031  | 5692242  | 0.02173                        | 0.00053                            | 0.00059                        |
| 39     | SARS2       | chr19 | 38916208 | 38916314 | 0.02159                        | 0.00053                            | 0.00059                        |
| 40     | QTRT1       | chr19 | 10712663 | 10712867 | 0.02155                        | 0.00052                            | 0.00058                        |
| 41     | MRPL39      | chr21 | 25607403 | 25607517 | 0.02039                        | 0.00052                            | 0.00058                        |
| 42     | CRAT        | chr9  | 1.29E+08 | 1.29E+08 | 0.02016                        | 0.00051                            | 0.00057                        |

|    |         |       |          |          |         |         |         |
|----|---------|-------|----------|----------|---------|---------|---------|
| 43 | OBSCN   | chr1  | 2.28E+08 | 2.28E+08 | 0.02012 | 0.00051 | 0.00057 |
| 44 | RHOT1   | chr17 | 32141226 | 32142729 | 0.01946 | 0.00051 | 0.00056 |
| 45 | FASN    | chr17 | 82084513 | 82084716 | 0.01803 | 0.00051 | 0.00054 |
| 46 | AGXT    | chr2  | 2.41E+08 | 2.41E+08 | 0.01793 | 0.00050 | 0.00053 |
| 47 | FPGS    | chr9  | 1.28E+08 | 1.28E+08 | 0.01781 | 0.00050 | 0.00053 |
| 48 | FDXR    | chr17 | 74866446 | 74867005 | 0.01755 | 0.00050 | 0.00052 |
| 49 | LIAS    | chr4  | 39463525 | 39464238 | 0.01754 | 0.00049 | 0.00052 |
| 50 | ECHDC2  | chr1  | 52904646 | 52906611 | 0.01753 | 0.00049 | 0.00051 |
| 51 | TMEM205 | chr19 | 11342776 | 11343120 | 0.01677 | 0.00049 | 0.00051 |
| 52 | NUCB2   | chr11 | 17276984 | 17277095 | 0.01675 | 0.00049 | 0.00051 |
| 53 | FASN    | chr17 | 82088390 | 82088562 | 0.01599 | 0.00048 | 0.00050 |
| 54 | NLRX1   | chr11 | 1.19E+08 | 1.19E+08 | 0.01588 | 0.00048 | 0.00049 |
| 55 | MTX1    | chr1  | 1.55E+08 | 1.55E+08 | 0.01431 | 0.00048 | 0.00048 |
| 56 | PACSIN2 | chr22 | 42876137 | 42876333 | 0.01396 | 0.00048 | 0.00048 |
| 57 | ATAD3B  | chr1  | 1489204  | 1490671  | 0.01378 | 0.00047 | 0.00047 |
| 58 | MECR    | chr1  | 29200324 | 29200589 | 0.01361 | 0.00046 | 0.00047 |
| 59 | MRPL51  | chr12 | 6493058  | 6494154  | 0.01318 | 0.00046 | 0.00046 |
| 60 | SARDH   | chr9  | 1.34E+08 | 1.34E+08 | 0.01285 | 0.00046 | 0.00046 |
| 61 | DHRX    | chrX  | 2243023  | 2243230  | 0.01259 | 0.00046 | 0.00046 |
| 62 | DDX28   | chr16 | 68023848 | 68024004 | 0.01253 | 0.00046 | 0.00045 |
| 63 | GAPDH   | chr12 | 6533927  | 6534661  | 0.01170 | 0.00045 | 0.00043 |
| 64 | LDHD    | chr16 | 75112602 | 75112713 | 0.01158 | 0.00045 | 0.00043 |
| 65 | LAMC1   | chr1  | 1.83E+08 | 1.83E+08 | 0.01157 | 0.00045 | 0.00042 |
| 66 | FASN    | chr17 | 82085158 | 82085402 | 0.01153 | 0.00044 | 0.00042 |
| 67 | REXO2   | chr11 | 1.14E+08 | 1.14E+08 | 0.01115 | 0.00044 | 0.00041 |
| 68 | HAGH    | chr16 | 1818515  | 1819223  | 0.01081 | 0.00042 | 0.00041 |
| 69 | DCXR    | chr17 | 82035858 | 82036063 | 0.01015 | 0.00041 | 0.00040 |
| 70 | EARS2   | chr16 | 23534888 | 23535449 | 0.00977 | 0.00041 | 0.00040 |
| 71 | ABCF2   | chr7  | 1.51E+08 | 1.51E+08 | 0.00970 | 0.00041 | 0.00040 |
| 72 | SLC22A4 | chr5  | 1.32E+08 | 1.32E+08 | 0.00947 | 0.00041 | 0.00040 |
| 73 | MCEE    | chr2  | 71109684 | 71110122 | 0.00937 | 0.00040 | 0.00039 |
| 74 | LONP1   | chr19 | 5694761  | 5694901  | 0.00922 | 0.00040 | 0.00039 |
| 75 | MSRA    | chr8  | 10411101 | 10411565 | 0.00911 | 0.00040 | 0.00039 |
| 76 | REXO2   | chr11 | 1.14E+08 | 1.14E+08 | 0.00799 | 0.00039 | 0.00038 |
| 77 | FAHD2A  | chr2  | 95410527 | 95411026 | 0.00756 | 0.00038 | 0.00038 |
| 78 | FDXR    | chr17 | 74865719 | 74865820 | 0.00735 | 0.00038 | 0.00038 |
| 79 | AARS2   | chr6  | 44305653 | 44305786 | 0.00729 | 0.00037 | 0.00037 |
| 80 | TPI1    | chr12 | 6869258  | 6869390  | 0.00725 | 0.00036 | 0.00036 |
| 81 | ETFA    | chr15 | 76230048 | 76230390 | 0.00634 | 0.00035 | 0.00036 |
| 82 | WDR81   | chr17 | 1730380  | 1730945  | 0.00632 | 0.00034 | 0.00034 |
| 83 | PINK1   | chr1  | 20644490 | 20644672 | 0.00587 | 0.00034 | 0.00034 |
| 84 | ATPAF2  | chr17 | 18018010 | 18018686 | 0.00576 | 0.00034 | 0.00034 |
| 85 | CPS1    | chr2  | 2.11E+08 | 2.11E+08 | 0.00566 | 0.00034 | 0.00033 |
| 86 | SIRT3   | chr11 | 236546   | 237144   | 0.00544 | 0.00033 | 0.00032 |
| 87 | OXNAD1  | chr3  | 16264595 | 16264972 | 0.00543 | 0.00033 | 0.00032 |
| 88 | MTHFD1  | chr14 | 64424804 | 64424931 | 0.00462 | 0.00032 | 0.00031 |

|    |            |       |          |          |         |         |         |
|----|------------|-------|----------|----------|---------|---------|---------|
| 89 | PTPMT1     | chr11 | 47565274 | 47565986 | 0.00426 | 0.00030 | 0.00030 |
| 90 | NIT1       | chr1  | 1.61E+08 | 1.61E+08 | 0.00314 | 0.00027 | 0.00027 |
| 91 | OPA1       | chr3  | 1.94E+08 | 1.94E+08 | 0.00302 | 0.00027 | 0.00027 |
| 92 | TCHP       | chr12 | 1.1E+08  | 1.1E+08  | 0.00268 | 0.00026 | 0.00026 |
| 93 | BCAT2      | chr19 | 48796578 | 48796718 | 0.00196 | 0.00024 | 0.00023 |
| 94 | PNPT1      | chr2  | 55679682 | 55679795 | 0.00193 | 0.00023 | 0.00022 |
| 95 | COX7A2L    | chr2  | 42352887 | 42353343 | 0.00159 | 0.00022 | 0.00021 |
| 96 | OBSCN      | chr1  | 2.28E+08 | 2.28E+08 | 0.00154 | 0.00022 | 0.00021 |
| 97 | SLC16A11   | chr17 | 7042930  | 7043923  | 0.00122 | 0.00019 | 0.00019 |
| 98 | NEU4       | chr2  | 2.42E+08 | 2.42E+08 | 0.00092 | 0.00014 | 0.00015 |
| 99 | AC005161.1 | chr7  | 1.11E+08 | 1.11E+08 | 0.00043 | 0.00010 | 0.00009 |



**Table S2.** Genes with significant lower 5hmC levels in obese- versus non-obese-MSCs. P values were adjusted by triglycerides levels, antihypertensives, and multivitamins.

| Peak # | Gene Symbol | Chr   | Start     | End       | Triglycerides<br>(adj p value) | Antihypertensives<br>(adj p value) | Multivitamins<br>(adj p value) |
|--------|-------------|-------|-----------|-----------|--------------------------------|------------------------------------|--------------------------------|
| 1      | MRRF        | chr9  | 122285169 | 122285946 | 0.00762                        | 0.00039                            | 0.00038                        |
| 2      | ACSL1       | chr4  | 184770255 | 184770332 | 0.00660                        | 0.00035                            | 0.00036                        |
| 3      | DNM1L       | chr12 | 32722427  | 32722772  | 0.00633                        | 0.00035                            | 0.00035                        |
| 4      | DHTKD1      | chr10 | 12091513  | 12091684  | 0.00546                        | 0.00034                            | 0.00033                        |
| 5      | TTC19       | chr17 | 16006474  | 16006568  | 0.00541                        | 0.00033                            | 0.00032                        |
| 6      | APOPT1      | chr14 | 103607204 | 103607523 | 0.00493                        | 0.00033                            | 0.00031                        |
| 7      | MRPL14      | chr6  | 44113454  | 44114209  | 0.00443                        | 0.00032                            | 0.00030                        |
| 8      | HIBADH      | chr7  | 27531192  | 27531348  | 0.00440                        | 0.00031                            | 0.00030                        |
| 9      | NCOA4       | chr10 | 46005088  | 46006597  | 0.00427                        | 0.00031                            | 0.00030                        |
| 10     | RHOT2       | chr16 | 667432    | 667833    | 0.00425                        | 0.00030                            | 0.00029                        |
| 11     | IMMP2L      | chr7  | 110724159 | 110724591 | 0.00423                        | 0.00030                            | 0.00029                        |
| 12     | GPAM        | chr10 | 112214319 | 112214396 | 0.00393                        | 0.00029                            | 0.00029                        |
| 13     | MTCP1       | chrX  | 155065486 | 155065537 | 0.00367                        | 0.00029                            | 0.00029                        |
| 14     | MRPS22      | chr3  | 139348160 | 139348507 | 0.00365                        | 0.00029                            | 0.00029                        |
| 15     | UCP1        | chr4  | 140559434 | 140560010 | 0.00350                        | 0.00029                            | 0.00028                        |
| 16     | GFM1        | chr3  | 158684524 | 158685314 | 0.00345                        | 0.00029                            | 0.00028                        |
| 17     | EEFSEC      | chr3  | 128336904 | 128337092 | 0.00336                        | 0.00028                            | 0.00028                        |
| 18     | OPA1        | chr3  | 193691394 | 193692132 | 0.00320                        | 0.00028                            | 0.00028                        |
| 19     | HSD17B4     | chr5  | 119535770 | 119536550 | 0.00316                        | 0.00028                            | 0.00028                        |
| 20     | SLIRP       | chr14 | 77717599  | 77718530  | 0.00305                        | 0.00027                            | 0.00027                        |
| 21     | COASY       | chr17 | 42561467  | 42561680  | 0.00288                        | 0.00027                            | 0.00027                        |
| 22     | PDSS2       | chr6  | 107458990 | 107459564 | 0.00285                        | 0.00027                            | 0.00027                        |
| 23     | FASN        | chr17 | 82093219  | 82093419  | 0.00277                        | 0.00026                            | 0.00026                        |
| 24     | DAAM2       | chr6  | 39899578  | 39900071  | 0.00252                        | 0.00026                            | 0.00026                        |
| 25     | SUOX        | chr12 | 55999333  | 55999590  | 0.00248                        | 0.00025                            | 0.00025                        |
| 26     | COA3        | chr17 | 42796621  | 42796936  | 0.00225                        | 0.00024                            | 0.00025                        |
| 27     | IKZF5       | chr10 | 122997119 | 122997513 | 0.00224                        | 0.00024                            | 0.00025                        |
| 28     | STARD7      | chr2  | 96195203  | 96195549  | 0.00216                        | 0.00024                            | 0.00024                        |
| 29     | ABCA13      | chr7  | 48278094  | 48279920  | 0.00215                        | 0.00024                            | 0.00024                        |
| 30     | DLAT        | chr11 | 112028792 | 112028945 | 0.00213                        | 0.00024                            | 0.00024                        |
| 31     | ECI1        | chr16 | 2239395   | 2240145   | 0.00211                        | 0.00024                            | 0.00023                        |
| 32     | SLC25A3     | chr12 | 98593591  | 98595848  | 0.00209                        | 0.00024                            | 0.00023                        |
| 33     | GLDC        | chr9  | 6532464   | 6533160   | 0.00194                        | 0.00024                            | 0.00022                        |
| 34     | PC          | chr11 | 66848233  | 66849147  | 0.00191                        | 0.00023                            | 0.00022                        |
| 35     | PI4KA       | chr22 | 20747484  | 20747702  | 0.00184                        | 0.00023                            | 0.00022                        |
| 36     | GATM        | chr15 | 45361124  | 45362221  | 0.00179                        | 0.00023                            | 0.00021                        |
| 37     | GLYCTK      | chr3  | 52288580  | 52289276  | 0.00179                        | 0.00023                            | 0.00021                        |
| 38     | ABCB9       | chr12 | 122959635 | 122960322 | 0.00176                        | 0.00023                            | 0.00021                        |
| 39     | MMADHC      | chr2  | 149569634 | 149570168 | 0.00173                        | 0.00023                            | 0.00021                        |
| 40     | ACSM5       | chr16 | 20440266  | 20441586  | 0.00172                        | 0.00023                            | 0.00021                        |
| 41     | ACADL       | chr2  | 210203331 | 210203444 | 0.00164                        | 0.00022                            | 0.00021                        |
| 42     | SLC22A4     | chr5  | 132294443 | 132295009 | 0.00147                        | 0.00022                            | 0.00021                        |

|    |            |       |           |           |         |         |         |
|----|------------|-------|-----------|-----------|---------|---------|---------|
| 43 | OXNAD1     | chr3  | 16294856  | 16294997  | 0.00141 | 0.00022 | 0.00020 |
| 44 | LRPPRC     | chr2  | 43901320  | 43903931  | 0.00139 | 0.00021 | 0.00020 |
| 45 | GFM1       | chr3  | 158645822 | 158646297 | 0.00138 | 0.00020 | 0.00020 |
| 46 | LAMC1      | chr1  | 183125188 | 183125550 | 0.00137 | 0.00020 | 0.00019 |
| 47 | MRPS5      | chr2  | 95087207  | 95087581  | 0.00134 | 0.00020 | 0.00019 |
| 48 | LYRM1      | chr16 | 20920122  | 20920674  | 0.00132 | 0.00020 | 0.00019 |
| 49 | BDH1       | chr3  | 197538306 | 197538484 | 0.00127 | 0.00020 | 0.00019 |
| 50 | AC007528.1 | chr12 | 16409255  | 16409331  | 0.00125 | 0.00019 | 0.00019 |
| 51 | NT5DC3     | chr12 | 103785571 | 103785747 | 0.00115 | 0.00018 | 0.00018 |
| 52 | CARS2      | chr13 | 110642315 | 110645633 | 0.00111 | 0.00018 | 0.00018 |
| 53 | KIAA0100   | chr17 | 28640397  | 28640683  | 0.00109 | 0.00017 | 0.00018 |
| 54 | NMNAT3     | chr3  | 139560180 | 139561392 | 0.00108 | 0.00017 | 0.00018 |
| 55 | METAP1D    | chr2  | 172070663 | 172071070 | 0.00108 | 0.00017 | 0.00017 |
| 56 | MRPS27     | chr5  | 72227050  | 72229553  | 0.00107 | 0.00016 | 0.00017 |
| 57 | DHCR24     | chr1  | 54871350  | 54871613  | 0.00107 | 0.00016 | 0.00017 |
| 58 | MAOB       | chrX  | 43766611  | 43767618  | 0.00107 | 0.00016 | 0.00017 |
| 59 | PACSIN2    | chr22 | 42912021  | 42912157  | 0.00102 | 0.00015 | 0.00017 |
| 60 | LYRM1      | chr16 | 20924000  | 20925006  | 0.00098 | 0.00015 | 0.00017 |
| 61 | TRAP1      | chr16 | 3676431   | 3676946   | 0.00096 | 0.00015 | 0.00016 |
| 62 | CROT       | chr7  | 87398524  | 87399795  | 0.00094 | 0.00015 | 0.00016 |
| 63 | TXNRD1     | chr12 | 104262314 | 104262575 | 0.00094 | 0.00015 | 0.00016 |
| 64 | PREPL      | chr2  | 44359497  | 44360676  | 0.00091 | 0.00014 | 0.00015 |
| 65 | NDUFAF4    | chr6  | 96889313  | 96891391  | 0.00085 | 0.00014 | 0.00015 |
| 66 | GATC       | chr12 | 120459907 | 120463749 | 0.00081 | 0.00014 | 0.00015 |
| 67 | ABCB9      | chr12 | 122948624 | 122949312 | 0.00080 | 0.00014 | 0.00014 |
| 68 | SFXN3      | chr10 | 101031073 | 101031157 | 0.00080 | 0.00014 | 0.00014 |
| 69 | SLC25A12   | chr2  | 171784370 | 171785475 | 0.00075 | 0.00014 | 0.00013 |
| 70 | EMC2       | chr8  | 108473851 | 108475963 | 0.00075 | 0.00014 | 0.00013 |
| 71 | TIMMDC1    | chr3  | 119523606 | 119525749 | 0.00074 | 0.00014 | 0.00013 |
| 72 | PCCA       | chr13 | 100530098 | 100532601 | 0.00072 | 0.00013 | 0.00013 |
| 73 | GLOD4      | chr17 | 783083    | 783517    | 0.00072 | 0.00013 | 0.00012 |
| 74 | FAM162A    | chr3  | 122401376 | 122401535 | 0.00071 | 0.00013 | 0.00012 |
| 75 | SPG7       | chr16 | 89548003  | 89548378  | 0.00070 | 0.00013 | 0.00012 |
| 76 | NLN        | chr5  | 65785775  | 65786060  | 0.00069 | 0.00012 | 0.00012 |
| 77 | RDH13      | chr19 | 55056653  | 55056808  | 0.00069 | 0.00012 | 0.00012 |
| 78 | MCU        | chr10 | 72859177  | 72859347  | 0.00069 | 0.00012 | 0.00012 |
| 79 | NT5DC3     | chr12 | 103788838 | 103789057 | 0.00069 | 0.00011 | 0.00012 |
| 80 | MGST3      | chr1  | 165648450 | 165648670 | 0.00066 | 0.00011 | 0.00011 |
| 81 | ACSL1      | chr4  | 184808292 | 184808601 | 0.00063 | 0.00011 | 0.00011 |
| 82 | MECR       | chr1  | 29223140  | 29223549  | 0.00061 | 0.00011 | 0.00011 |
| 83 | GDAP1      | chr8  | 74363985  | 74366876  | 0.00061 | 0.00011 | 0.00011 |
| 84 | QRSL1      | chr6  | 106652467 | 106653823 | 0.00058 | 0.00011 | 0.00011 |
| 85 | TRAP1      | chr16 | 3656964   | 3657341   | 0.00057 | 0.00011 | 0.00010 |
| 86 | ECH1       | chr19 | 38830904  | 38831166  | 0.00057 | 0.00011 | 0.00010 |
| 87 | CYP11A1    | chr15 | 74337759  | 74338103  | 0.00055 | 0.00011 | 0.00010 |
| 88 | DDAH1      | chr1  | 85398457  | 85399963  | 0.00051 | 0.00011 | 0.00010 |

|     |             |       |           |           |         |         |         |
|-----|-------------|-------|-----------|-----------|---------|---------|---------|
| 89  | RP11-60I3.4 | chr9  | 99928778  | 99929169  | 0.00050 | 0.00010 | 0.00010 |
| 90  | ABHD10      | chr3  | 111991377 | 111993363 | 0.00046 | 0.00010 | 0.00009 |
| 91  | ACADM       | chr1  | 75762692  | 75763679  | 0.00043 | 0.00010 | 0.00009 |
| 92  | C15orf40    | chr15 | 82989881  | 82991057  | 0.00042 | 0.00010 | 0.00009 |
| 93  | DNAJA3      | chr16 | 4440257   | 4441575   | 0.00040 | 0.00010 | 0.00009 |
| 94  | SSBP1       | chr7  | 141737383 | 141737775 | 0.00034 | 0.00010 | 0.00009 |
| 95  | MAOB        | chrX  | 43769307  | 43769418  | 0.00033 | 0.00010 | 0.00009 |
| 96  | LIPT1       | chr2  | 99154291  | 99154636  | 0.00032 | 0.00010 | 0.00008 |
| 97  | MRRF        | chr9  | 122330867 | 122331343 | 0.00031 | 0.00009 | 0.00008 |
| 98  | PNPLA8      | chr7  | 108554543 | 108554859 | 0.00031 | 0.00009 | 0.00008 |
| 99  | SLC25A20    | chr3  | 48859092  | 48859201  | 0.00031 | 0.00008 | 0.00008 |
| 100 | MRPS5       | chr2  | 95108175  | 95108408  | 0.00030 | 0.00008 | 0.00008 |
| 101 | NDUFAF7     | chr2  | 37241578  | 37242693  | 0.00028 | 0.00008 | 0.00008 |
| 102 | MUTYH       | chr1  | 45334100  | 45334511  | 0.00027 | 0.00007 | 0.00007 |
| 103 | EPHX2       | chr8  | 27516320  | 27516398  | 0.00027 | 0.00007 | 0.00007 |
| 104 | SAMM50      | chr22 | 43964452  | 43964553  | 0.00026 | 0.00007 | 0.00007 |
| 105 | NDUFA2      | chr5  | 140644573 | 140645725 | 0.00026 | 0.00007 | 0.00007 |
| 106 | ABCA13      | chr7  | 48352181  | 48352487  | 0.00026 | 0.00007 | 0.00007 |
| 107 | NNT         | chr5  | 43612908  | 43613650  | 0.00026 | 0.00006 | 0.00006 |
| 108 | AK2         | chr1  | 33007984  | 33010833  | 0.00025 | 0.00006 | 0.00006 |
| 109 | LYRM4       | chr6  | 5236284   | 5236461   | 0.00023 | 0.00006 | 0.00006 |
| 110 | PDHB        | chr3  | 58430657  | 58433857  | 0.00023 | 0.00006 | 0.00006 |
| 111 | DLAT        | chr11 | 112026198 | 112026299 | 0.00022 | 0.00006 | 0.00006 |
| 112 | C15orf40    | chr15 | 82988441  | 82988828  | 0.00021 | 0.00006 | 0.00006 |
| 113 | PPOX        | chr1  | 161167100 | 161167486 | 0.00020 | 0.00006 | 0.00005 |
| 114 | TYSND1      | chr10 | 70143842  | 70144835  | 0.00019 | 0.00005 | 0.00005 |
| 115 | PCK2        | chr14 | 24099558  | 24100562  | 0.00015 | 0.00005 | 0.00005 |
| 116 | TEFM        | chr17 | 30898908  | 30900562  | 0.00015 | 0.00005 | 0.00005 |
| 117 | MRPL11      | chr11 | 66435075  | 66436112  | 0.00014 | 0.00005 | 0.00005 |
| 118 | CPOX        | chr3  | 98579442  | 98580770  | 0.00014 | 0.00005 | 0.00005 |
| 119 | GSTK1       | chr7  | 143269292 | 143270854 | 0.00013 | 0.00005 | 0.00005 |
| 120 | AIFM2       | chr10 | 70121092  | 70121211  | 0.00013 | 0.00005 | 0.00004 |
| 121 | ECI1        | chr16 | 2242415   | 2243439   | 0.00013 | 0.00004 | 0.00004 |
| 122 | NFS1        | chr20 | 35673758  | 35674431  | 0.00011 | 0.00004 | 0.00004 |
| 123 | RAB24       | chr5  | 177301198 | 177301807 | 0.00011 | 0.00004 | 0.00004 |
| 124 | RPS15A      | chr16 | 18781295  | 18786795  | 0.00011 | 0.00003 | 0.00004 |
| 125 | ACOT13      | chr6  | 24700907  | 24706262  | 0.00009 | 0.00003 | 0.00004 |
| 126 | MRPL39      | chr21 | 25601368  | 25601467  | 0.00009 | 0.00003 | 0.00003 |
| 127 | OBSCN       | chr1  | 228302389 | 228302998 | 0.00008 | 0.00002 | 0.00003 |
| 128 | ALDH7A1     | chr5  | 126541841 | 126545019 | 0.00007 | 0.00002 | 0.00003 |
| 129 | METTL15     | chr11 | 28330396  | 28333507  | 0.00007 | 0.00002 | 0.00002 |
| 130 | KIF1B       | chr1  | 10376545  | 10381603  | 0.00006 | 0.00002 | 0.00002 |
| 131 | ALDH7A1     | chr5  | 126594108 | 126594439 | 0.00006 | 0.00002 | 0.00002 |
| 132 | COX20       | chr1  | 244839747 | 244845344 | 0.00006 | 0.00002 | 0.00002 |
| 133 | MTO1        | chr6  | 73480997  | 73481116  | 0.00006 | 0.00002 | 0.00002 |
| 134 | SUGCT       | chr7  | 40860316  | 40860763  | 0.00005 | 0.00002 | 0.00002 |

|     |          |       |           |           |         |         |         |
|-----|----------|-------|-----------|-----------|---------|---------|---------|
| 135 | SND1     | chr7  | 127857852 | 127858488 | 0.00004 | 0.00002 | 0.00002 |
| 136 | MTCH1    | chr6  | 36969466  | 36970114  | 0.00004 | 0.00001 | 0.00002 |
| 137 | C15orf61 | chr15 | 67521068  | 67522242  | 0.00003 | 0.00001 | 0.00001 |
| 138 | NDUFAF5  | chr20 | 13817118  | 13821582  | 0.00003 | 0.00001 | 0.00001 |
| 139 | RMDN3    | chr15 | 40738501  | 40739680  | 0.00003 | 0.00001 | 0.00001 |
| 140 | C8orf82  | chr8  | 144529179 | 144530616 | 0.00003 | 0.00001 | 0.00001 |
| 141 | COX15    | chr10 | 99713515  | 99714718  | 0.00002 | 0.00001 | 0.00001 |
| 142 | FABP1    | chr2  | 88126485  | 88126746  | 0.00002 | 0.00001 | 0.00001 |
| 143 | EARS2    | chr16 | 23522014  | 23524454  | 0.00001 | 0.00001 | 0.00001 |
| 144 | ACAD9    | chr3  | 128912507 | 128913114 | 0.00001 | 0.00000 | 0.00000 |
| 145 | NDUFAF5  | chr20 | 13803150  | 13803421  | 0.00001 | 0.00000 | 0.00000 |
| 146 | SLC25A16 | chr10 | 68499532  | 68499968  | 0.00001 | 0.00000 | 0.00000 |
| 147 | IFI27    | chr14 | 94116442  | 94116698  | 0.00000 | 0.00000 | 0.00000 |
| 148 | RPS15A   | chr16 | 18788063  | 18788159  | 0.00000 | 0.00000 | 0.00000 |
| 149 | SLC25A28 | chr10 | 99610522  | 99611366  | 0.00000 | 0.00000 | 0.00000 |
| 150 | MPC1     | chr6  | 166365974 | 166366106 | 0.00000 | 0.00000 | 0.00000 |
